# Supplementary material for: Digital PCR for the Analysis of MYC Copy Number Variation in Lung Cancer
Source: Hindawi journal article supplement (doi:10.1155/2020/4176376), 2020-09-21
Supplement: f1 [file 4176376.f1.pdf]

Table 1. Levels of *RNaseP* (copies/ $\mu$ L) and *MYC* (copies/ $\mu$ L) by dPCR

| Sample | Non-Tumor/<br>Tumor | Non-treated   |            | Digested      |            | Pre-amplified |            |
|--------|---------------------|---------------|------------|---------------|------------|---------------|------------|
|        |                     | <i>RNaseP</i> | <i>MYC</i> | <i>RNaseP</i> | <i>MYC</i> | <i>RNaseP</i> | <i>MYC</i> |
| 003    | NT                  | 692           | 704        | 814           | 840        | 851           | 876        |
|        | T                   | 539           | 1008       | 770           | 1423       | 740           | 1500       |
| 015    | NT                  | 527           | 518        | 975           | 945        | 591           | 573        |
|        | T                   | 455           | 555        | 953           | 1181       | 525           | 668        |
| 026    | NT                  | 803           | 811        | 864           | 825        | 439           | 487        |
|        | T                   | 736           | 741        | 963           | 943        | 790           | 771        |
| 028    | NT                  | 885           | 886        | 1020          | 1067       | 421           | 414        |
|        | T                   | 578           | 976        | 699           | 1166       | 765           | 1176       |
| 033    | NT                  | 742           | 719        | 980           | 958        | 907           | 907        |
|        | T                   | 828           | 924        | 859           | 973        | 369           | 412        |
| 042    | NT                  | 881           | 875        | 899           | 968        | 448           | 481        |
|        | T                   | 745           | 1583       | 850           | 1657       | 571           | 1266       |
| 046    | NT                  | 686           | 697        | 1061          | 1057       | 847           | 897        |
|        | T                   | 439           | 532        | 1209          | 1553       | 511           | 611        |
| 049    | NT                  | 391           | 391        | 419           | 410        | 467           | 452        |
|        | T                   | 381           | 462        | 540           | 641        | 469           | 547        |

Table 2. Levels of *RNaseP* (Ct) and *MYC* (Ct) by qPCR

| Sample | Non-Tumor/Tumor | <i>RNaseP</i> | <i>MYC</i> |
|--------|-----------------|---------------|------------|
| 001    | NT              | 25,50         | 24,76      |
|        | T               | 25,79         | 24,77      |
| 002    | NT              | 25,54         | 24,82      |
|        | T               | 27,23         | 26,30      |
| 003    | NT              | 25,91         | 25,09      |
|        | T               | 26,25         | 24,79      |
| 004    | NT              | 25,94         | 25,15      |
|        | T               | 25,79         | 24,68      |
| 005    | NT              | 25,63         | 24,89      |
|        | T               | 25,91         | 25,17      |
| 006    | NT              | 25,82         | 25,08      |
|        | T               | 25,68         | 24,96      |
| 007    | NT              | 25,60         | 24,81      |
|        | T               | 25,74         | 24,87      |
| 008    | NT              | 25,77         | 24,94      |
|        | T               | 25,70         | 24,61      |
| 009    | NT              | 25,76         | 25,02      |
|        | T               | 25,41         | 24,64      |
| 010    | NT              | 25,59         | 25,12      |
|        | T               | 25,85         | 24,90      |
| 011    | NT              | 25,63         | 24,93      |
|        | T               | 25,57         | 24,90      |
| 012    | NT              | 25,92         | 24,96      |
|        | T               | 25,70         | 24,88      |
| 013    | NT              | 26,12         | 25,44      |
|        | T               | 25,90         | 24,81      |
| 014    | NT              | 25,68         | 24,97      |
|        | T               | 25,83         | 25,01      |
| 015    | NT              | 25,77         | 25,19      |
|        | T               | 25,74         | 24,85      |
| 016    | NT              | 25,76         | 25,01      |
|        | T               | 26,17         | 25,33      |
| 017    | NT              | 25,90         | 25,11      |
|        | T               | 25,99         | 25,04      |
| 018    | NT              | 25,94         | 25,31      |
|        | T               | 25,78         | 25,09      |
| 019    | NT              | 26,09         | 25,41      |
|        | T               | 26,81         | 24,88      |
| 020    | NT              | 26,03         | 25,25      |
|        | T               | 26,22         | 25,49      |
| 021    | NT              | 26,24         | 25,44      |
|        | T               | 26,24         | 25,44      |
| 022    | NT              | 26,16         | 25,38      |
|        | T               | 26,10         | 25,22      |
| 023    | NT              | 25,98         | 25,18      |
|        | T               | 25,75         | 24,97      |
| 024    | NT              | 25,59         | 24,73      |
|        | T               | 26,19         | 25,11      |

|     |    |       |       |
|-----|----|-------|-------|
| 025 | NT | 25,98 | 25,33 |
|     | T  | 26,13 | 25,41 |
| 026 | NT | 26,26 | 25,42 |
|     | T  | 26,13 | 25,27 |
| 027 | NT | 25,93 | 25,13 |
|     | T  | 25,85 | 25,23 |
| 028 | NT | 26,18 | 25,31 |
|     | T  | 26,40 | 25,02 |
| 029 | NT | 26,22 | 25,32 |
|     | T  | 25,88 | 25,03 |
| 030 | NT | 25,93 | 25,12 |
|     | T  | 26,07 | 25,33 |
| 031 | NT | 25,86 | 25,10 |
|     | T  | 25,86 | 25,12 |
| 032 | NT | 25,75 | 25,07 |
|     | T  | 26,38 | 25,66 |
| 033 | NT | 25,81 | 25,08 |
|     | T  | 26,15 | 25,26 |
| 034 | NT | 26,01 | 25,48 |
|     | T  | 25,22 | 24,47 |
| 035 | NT | 26,03 | 25,22 |
|     | T  | 25,80 | 25,03 |
| 036 | NT | 25,43 | 24,87 |
|     | T  | 26,16 | 25,50 |
| 037 | NT | 25,54 | 24,94 |
|     | T  | 25,85 | 25,19 |
| 038 | NT | 25,19 | 24,46 |
|     | T  | 25,29 | 24,63 |
| 039 | NT | 26,00 | 25,28 |
|     | T  | 25,20 | 24,78 |
| 040 | NT | 25,41 | 24,87 |
|     | T  | 26,85 | 26,12 |
| 041 | NT | 25,66 | 24,89 |
|     | T  | 25,72 | 24,88 |
| 042 | NT | 26,12 | 25,38 |
|     | T  | 25,70 | 24,16 |
| 043 | NT | 25,67 | 24,96 |
|     | T  | 25,77 | 24,79 |
| 044 | NT | 25,81 | 25,12 |
|     | T  | 25,93 | 25,17 |
| 045 | NT | 25,82 | 24,92 |
|     | T  | 25,74 | 25,19 |
| 046 | NT | 25,72 | 24,93 |
|     | T  | 26,35 | 25,36 |
| 047 | NT | 25,72 | 24,89 |
|     | T  | 25,83 | 25,07 |
| 048 | NT | 25,67 | 24,97 |
|     | T  | 25,33 | 24,02 |
| 049 | NT | 26,74 | 25,96 |
|     | T  | 26,76 | 25,86 |

|     |    |       |       |
|-----|----|-------|-------|
| 050 | NT | 26,33 | 25,58 |
|     | T  | 26,02 | 24,91 |
| 051 | NT | 25,61 | 24,96 |
|     | T  | 26,29 | 24,75 |
| 052 | NT | 25,80 | 25,10 |
|     | T  | 24,57 | 23,77 |
| 053 | NT | 26,24 | 25,51 |
|     | T  | 26,01 | 24,98 |
| 054 | NT | 25,74 | 25,01 |
|     | T  | 25,75 | 24,60 |
| 055 | NT | 25,60 | 25,00 |
|     | T  | 24,58 | 23,92 |
| 056 | NT | 25,97 | 25,23 |
|     | T  | 25,77 | 24,92 |
| 057 | NT | 25,81 | 25,11 |
|     | T  | 24,96 | 24,12 |
| 058 | NT | 26,40 | 25,68 |
|     | T  | 26,68 | 25,84 |

Table 3. Levels of *RNaseP* (copies/ $\mu$ L) and *MYC* (copies/ $\mu$ L) by dPCR

| Sample | Non-Tumor/Tumor | <i>RNaseP</i> | <i>MYC</i> |
|--------|-----------------|---------------|------------|
| 001    | NT              | 994           | 972        |
|        | T               | 789           | 977        |
| 002    | NT              | 837           | 906        |
|        | T               | 544           | 561        |
| 003    | NT              | 692           | 704        |
|        | T               | 539           | 1008       |
| 004    | NT              | 520           | 486        |
|        | T               | 947           | 863        |
| 005    | NT              | 691           | 692        |
|        | T               | 589           | 590        |
| 006    | NT              | 981           | 956        |
|        | T               | 1155          | 1187       |
| 007    | NT              | 853           | 893        |
|        | T               | 817           | 910        |
| 008    | NT              | 762           | 785        |
|        | T               | 752           | 1078       |
| 009    | NT              | 743           | 712        |
|        | T               | 725           | 723        |
| 010    | NT              | 703           | 634        |
|        | T               | 719           | 957        |
| 011    | NT              | 889           | 889        |
|        | T               | 867           | 840        |
| 012    | NT              | 799           | 859        |
|        | T               | 1063          | 1204       |
| 013    | NT              | 494           | 473        |
|        | T               | 432           | 529        |
| 014    | NT              | 362           | 344        |
|        | T               | 432           | 529        |
| 015    | NT              | 527           | 518        |
|        | T               | 455           | 555        |
| 016    | NT              | 1720          | 1725       |
|        | T               | 975           | 981        |
| 017    | NT              | 945           | 913        |
|        | T               | 611           | 697        |
| 018    | NT              | 722           | 700        |
|        | T               | 748           | 753        |
| 019    | NT              | 649           | 636        |
|        | T               | 356           | 798        |
| 020    | NT              | 693           | 693        |
|        | T               | 500           | 488        |
| 021    | NT              | 501           | 492        |
|        | T               | 536           | 531        |
| 022    | NT              | 684           | 678        |
|        | T               | 549           | 570        |
| 023    | NT              | 660           | 642        |
|        | T               | 868           | 868        |
| 024    | NT              | 1001          | 1024       |
|        | T               | 557           | 652        |

|     |    |      |      |
|-----|----|------|------|
| 025 | NT | 706  | 647  |
|     | T  | 664  | 619  |
| 026 | NT | 803  | 811  |
|     | T  | 736  | 741  |
| 027 | NT | 621  | 635  |
|     | T  | 826  | 736  |
| 028 | NT | 885  | 886  |
|     | T  | 578  | 976  |
| 029 | NT | 441  | 494  |
|     | T  | 696  | 797  |
| 030 | NT | 738  | 717  |
|     | T  | 713  | 720  |
| 031 | NT | 728  | 737  |
|     | T  | 814  | 826  |
| 032 | NT | 917  | 856  |
|     | T  | 977  | 934  |
| 033 | NT | 742  | 719  |
|     | T  | 828  | 924  |
| 034 | NT | 490  | 498  |
|     | T  | 1004 | 961  |
| 035 | NT | 746  | 738  |
|     | T  | 832  | 819  |
| 036 | NT | 1086 | 965  |
|     | T  | 613  | 637  |
| 037 | NT | 908  | 976  |
|     | T  | 702  | 598  |
| 038 | NT | 761  | 828  |
|     | T  | 1021 | 895  |
| 039 | NT | 620  | 618  |
|     | T  | 1274 | 1024 |
| 040 | NT | 888  | 854  |
|     | T  | 569  | 545  |
| 041 | NT | 997  | 958  |
|     | T  | 739  | 847  |
| 042 | NT | 881  | 875  |
|     | T  | 745  | 1583 |
| 043 | NT | 814  | 802  |
|     | T  | 614  | 769  |
| 044 | NT | 917  | 884  |
|     | T  | 786  | 783  |
| 045 | NT | 873  | 903  |
|     | T  | 843  | 883  |
| 046 | NT | 686  | 697  |
|     | T  | 439  | 532  |
| 047 | NT | 766  | 763  |
|     | T  | 648  | 715  |
| 048 | NT | 819  | 820  |
|     | T  | 898  | 1473 |
| 049 | NT | 391  | 391  |
|     | T  | 381  | 462  |

|     |    |      |      |
|-----|----|------|------|
| 050 | NT | 553  | 551  |
|     | T  | 588  | 738  |
| 051 | NT | 764  | 740  |
|     | T  | 457  | 892  |
| 052 | NT | 783  | 751  |
|     | T  | 1155 | 1314 |
| 053 | NT | 582  | 565  |
|     | T  | 719  | 910  |
| 054 | NT | 834  | 819  |
|     | T  | 853  | 1369 |
| 055 | NT | 605  | 566  |
|     | T  | 1602 | 1561 |
| 056 | NT | 647  | 648  |
|     | T  | 812  | 786  |
| 057 | NT | 692  | 717  |
|     | T  | 1154 | 1230 |
| 058 | NT | 499  | 517  |
|     | T  | 399  | 436  |
| 059 | NT | 635  | 639  |
|     | T  | 645  | 709  |
| 060 | NT | 518  | 478  |
|     | T  | 679  | 856  |
| 061 | NT | 576  | 587  |
|     | T  | 434  | 456  |
| 062 | NT | 545  | 574  |
|     | T  | 763  | 792  |
| 063 | NT | 350  | 371  |
|     | T  | 500  | 880  |
| 064 | NT | 664  | 699  |
|     | T  | 818  | 895  |
| 065 | NT | 445  | 451  |
|     | T  | 657  | 748  |
| 066 | NT | 507  | 423  |
|     | T  | 572  | 712  |
| 067 | NT | 501  | 542  |
|     | T  | 552  | 528  |
| 068 | NT | 646  | 684  |
|     | T  | 1634 | 1703 |
| 069 | NT | 747  | 757  |
|     | T  | 517  | 597  |
| 070 | NT | 430  | 464  |
|     | T  | 556  | 536  |
| 071 | NT | 579  | 551  |
|     | T  | 625  | 638  |
| 072 | NT | 590  | 589  |
|     | T  | 684  | 648  |
| 073 | NT | 865  | 869  |
|     | T  | 854  | 892  |
| 074 | NT | 658  | 661  |
|     | T  | 620  | 627  |

|     |    |      |      |
|-----|----|------|------|
| 075 | NT | 1063 | 1065 |
|     | T  | 611  | 603  |
| 076 | NT | 667  | 656  |
|     | T  | 593  | 759  |
| 077 | NT | 690  | 713  |
|     | T  | 528  | 536  |
| 078 | NT | 674  | 649  |
|     | T  | 558  | 565  |
| 079 | NT | 560  | 572  |
|     | T  | 542  | 461  |
| 080 | NT | 698  | 672  |
|     | T  | 753  | 702  |
| 081 | NT | 671  | 646  |
|     | T  | 773  | 714  |
| 082 | NT | 667  | 665  |
|     | T  | 690  | 1123 |
| 083 | NT | 738  | 695  |
|     | T  | 547  | 524  |
| 084 | NT | 719  | 724  |
|     | T  | 749  | 729  |
| 085 | NT | 663  | 628  |
|     | T  | 717  | 835  |
| 086 | NT | 596  | 593  |
|     | T  | 497  | 479  |
| 087 | NT | 794  | 770  |
|     | T  | 711  | 898  |
| 088 | NT | 792  | 782  |
|     | T  | 691  | 1004 |
| 089 | NT | 627  | 583  |
|     | T  | 582  | 582  |
| 090 | NT | 551  | 530  |
|     | T  | 673  | 836  |
| 091 | NT | 558  | 551  |
|     | T  | 539  | 611  |
| 092 | NT | 547  | 550  |
|     | T  | 573  | 602  |
| 093 | NT | 666  | 629  |
|     | T  | 640  | 480  |
| 094 | NT | 650  | 600  |
|     | T  | 645  | 676  |
| 095 | NT | 652  | 650  |
|     | T  | 482  | 468  |
| 096 | NT | 607  | 593  |
|     | T  | 667  | 654  |
| 097 | NT | 857  | 839  |
|     | T  | 686  | 709  |
| 098 | NT | 967  | 919  |
|     | T  | 698  | 510  |
| 099 | NT | 681  | 670  |
|     | T  | 628  | 677  |



|     |    |      |      |
|-----|----|------|------|
| 100 | NT | 869  | 819  |
|     | T  | 531  | 454  |
| 101 | NT | 869  | 815  |
|     | T  | 696  | 701  |
| 102 | NT | 910  | 982  |
|     | T  | 959  | 1006 |
| 103 | NT | 947  | 982  |
|     | T  | 871  | 1343 |
| 104 | NT | 1214 | 1315 |
|     | T  | 881  | 1697 |
| 105 | NT | 1309 | 1365 |
|     | T  | 1196 | 1400 |
| 106 | NT | 1301 | 1410 |
|     | T  | 822  | 867  |
| 107 | NT | 807  | 810  |
|     | T  | 1076 | 1061 |
| 108 | NT | 1707 | 1744 |
|     | T  | 898  | 780  |
| 109 | NT | 1937 | 2026 |
|     | T  | 1231 | 1399 |
| 110 | NT | 593  | 623  |
|     | T  | 1295 | 1330 |
| 111 | NT | 786  | 807  |
|     | T  | 734  | 815  |
| 112 | NT | 1069 | 1101 |
|     | T  | 1797 | 1848 |
| 113 | NT | 713  | 741  |
|     | T  | 1310 | 1517 |
| 114 | NT | 707  | 724  |
|     | T  | 1070 | 1260 |
| 115 | NT | 520  | 547  |
|     | T  | 669  | 790  |
| 116 | NT | 975  | 998  |
|     | T  | 1354 | 1368 |
| 117 | NT | 1252 | 1362 |
|     | T  | 718  | 883  |
| 118 | NT | 1085 | 1169 |
|     | T  | 1539 | 1298 |
| 119 | NT | 1449 | 1573 |
|     | T  | 314  | 351  |
| 120 | NT | 728  | 789  |
|     | T  | 623  | 712  |
| 121 | NT | 659  | 712  |
|     | T  | 784  | 1517 |
| 122 | NT | 978  | 928  |
|     | T  | 778  | 854  |
| 123 | NT | 713  | 711  |
|     | T  | 877  | 631  |
| 124 | NT | 1341 | 1315 |
|     | T  | 1451 | 1254 |

|     |    |      |      |
|-----|----|------|------|
| 125 | NT | 1619 | 1621 |
|     | T  | 1457 | 1608 |
| 126 | NT | 1360 | 1318 |
|     | T  | 1238 | 1214 |
| 127 | NT | 790  | 782  |
|     | T  | 693  | 665  |
| 128 | NT | 650  | 637  |
|     | T  | 677  | 697  |
| 129 | NT | 741  | 723  |
|     | T  | 846  | 807  |
